# Supplementary material for: Complex congenital cardiac anomalies in an infant with Multi-system disorders presenting in Heart failure; A case report
Source: Research Square preprint supplement (doi:10.21203/rs.3.rs-5958670/v1), 2025-02-11
Supplement: Supplementary file 1 [file 90674539746c27605abaccc8.docx]

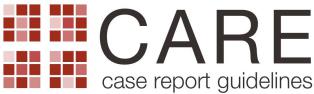
**CARE Checklist (2013) of information to include when writing a case report
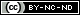
**

**Topic Item Checklist item description Reported on Page**

**Title 1** Complex congenital cardiac anomalies in an infant with Multi-system disorders presenting in Heart failure: A case report 1

**Key Words 2** Complex congenital heart anomalies, Complete atrioventricular septal defect, Echocardiography, 2

Pulmonary stenosis, Case report

**Abstract 3a** Congenital anomalies are rare but can be extremely complex, presenting significant challenges for both 2

diagnosis and treatment, especially in developing countries like Nigeria.These conditions often require

precise imaging and a personalized approach to care.

**3b** We present the case of a 10-month-old infant with a rare combination of left atrial isomerism with a 2

single atrium, complete atrioventricular septal defect (AVSD), and severe pulmonary stenosis, who

presented with features of cardiac failure. Imaging played a crucial role in identifying the anomalies,

guiding diagnosis, and informing management strategies.

**3c** Despite financial constraints limiting surgical intervention, the patient continues to be managed with 2

an anti-failure regimen.

**3d** Advanced imaging and a multidisciplinary approach are critical in managing congenital heart defects. 2

This case highlights the importance of early detection and thorough evaluation, even

in resource-limited settings, to optimize patient outcomes.

**Introduction 4** In Nigeria, about 3.5 cases of congenital heart disease are seen in every 1000 live births.[5](#_ENREF_5" \o "Abdulkadir, 2016 #336)

Early detection of such anomalies is rare and only few tend to benefit from surgical intervention in such 3

developing countries largely due to socio-economic challenges.[6](#_ENREF_6" \o "Mocumbi, 2011 #338) We present an unusual case of

left atrial isomerism, complete AVSD with situs ambiguus and vertebral anomalies which are rare

coexisting anomalies that were detected in infancy describing the presentation and management

which will further add to the limited data in the literature.

**Patient Information 5a** The index patient is a 10-month-old who first presented as a moderate preterm female baby

(delivered at 34 weeks on account of worsening maternal diabetes and pregnancy-induced hypertension) 4

in the 9th week of life

**5b** fever, cough, difficulty in breathing and dusky lips; these were preceded by catarrhal symptoms. 4

Admitting SPO2 was 79% which rose to 97% on intranasal oxygen supplementation.

**5c** Medical, family, and psychosocial history including relevant genetic information (also see timeline). None was available

**5d** Relevant past interventions and their outcomes None

**Clinical Findings 6** She was febrile, moderately pale and in severe respiratory distress – dyspnoiec, tachypnoiec, 4

centrally cyanosed and grunting. She had bronchial breath sounds with rhales, tachycardia,

a non-radiating pansystolic .Left lower sternal edge (LLSE) grade 4 murmur and tender hepatomegaly.

Admitting PCV was 28%.

**Timeline 7** Important information from the patient’s history organized as a timeline NA

# Diagnostic Assessment

**Therapeutic Intervention**

**Follow-up and Outcomes**

**8a** Diagnostic methods (such as PE, laboratory testing, imaging, surveys) :Echocardigram, abdominal ultrasound, 4-10

Computed tomogram

**8b** Diagnostic challenges (such as access, financial, or cultural) Financial

**8c** Diagnostic reasoning including other diagnoses considered:A final diagnosis of complex congenital

heart disease: left atrial isomerism, complete AVSD with situs ambiguus and vertebral anomalies 6

was made

**8d** Prognostic characteristics (such as staging in oncology) where applicable NA

**9a** Types of intervention (such as pharmacologic, surgical, preventive, self-care) Pharmacological 4

**9b** Administration of intervention (such as dosage, strength, duration) 3, 4, 5

**9** Changes in intervention (with rationale) 5

**10a** Clinician and patient-assessed outcomes (when appropriate) NA

**10b** Important follow-up diagnostic and other test results NA

**10c** Intervention adherence and tolerability (How was this assessed?) NA

**10d** Adverse and unanticipated events NA

**Discussion 11a** Discussion of the strengths and limitations in your approach to this case 11,12

**11b** Discussion of the relevant medical literature 11,12

**11c** The rationale for conclusions (including assessment of possible causes) 12

**11d**  NA

**Patient Perspective 12** When appropriate the patient should share their perspective on the treatments they received NA

**Informed Consent 13** Did the patient give informed consent? Please provide if requested . . . . . . . . . . . . . . . . . . . . . . . . . . . . . . . . . . . . . . **Yes**
